# Supplementary material for: A cognitive QoS management framework for WLANs
Source: Springer Nature journal article supplement (doi:10.1186/1687-1499-2014-191), 2014-11-15

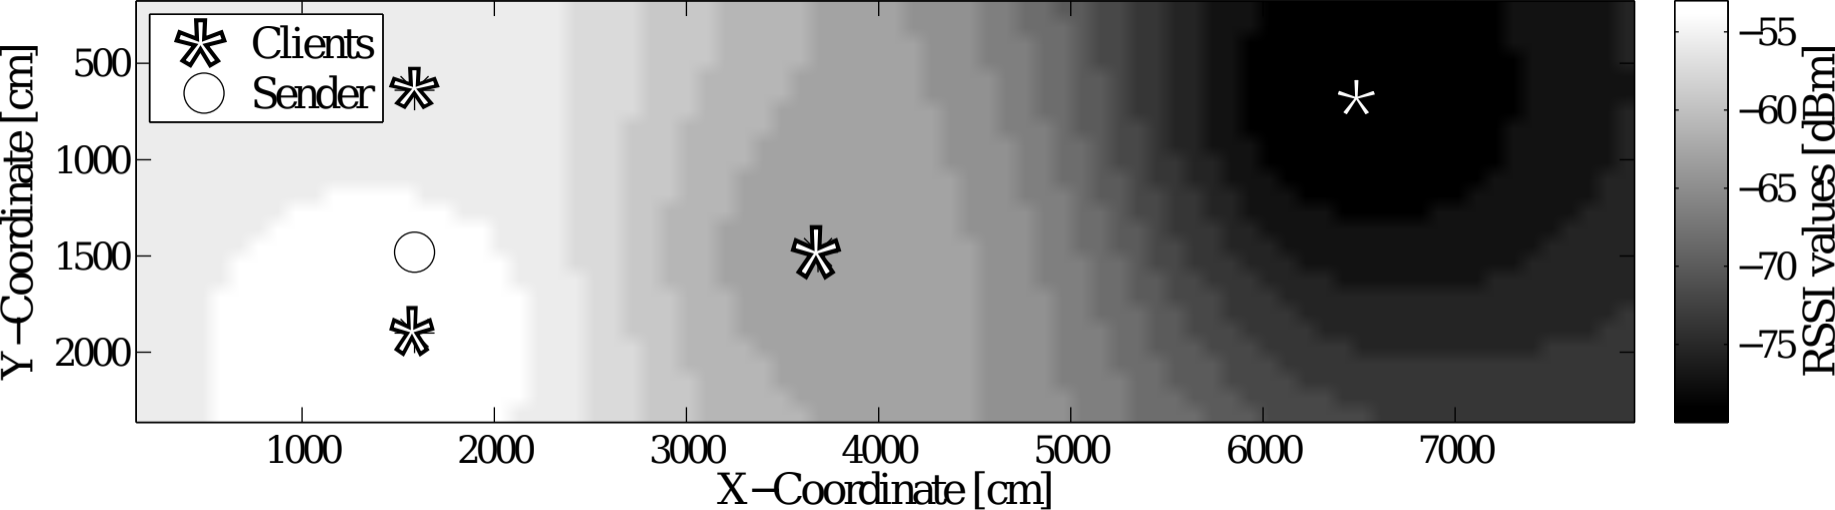

Supplement: 13638_2014_1003_MOESM13_ESM.pdf [file 13638_2014_1003_MOESM13_ESM.pdf]
